# Supplementary material for: GABA in the anterior cingulate cortex mediates the association of white matter hyperintensities with executive function: a magnetic resonance spectroscopy study
Source: publisher site journal article supplement (doi:10.18632/aging.205585), 2024-03-01
Supplement: Supplementary file [file aging-v16i5-205585-supplementary-material-SD1.pdf]

## SUPPLEMENTARY TABLES

**Supplementary Table 1. Partial correlations between metabolites, WMH volume, and cognitive function.**

|                               | Executive function |                  | Attention |              | Episodic memory |              |
|-------------------------------|--------------------|------------------|-----------|--------------|-----------------|--------------|
|                               | r                  | p                | r         | p            | r               | p            |
| ACC(GABA+/Cr)                 | 0.342              | <b>0.001</b>     | 0.237     | <b>0.030</b> | 0.121           | 0.274        |
| ACC(Glx/Cr)                   | -0.035             | 0.749            | -0.112    | 0.310        | -0.052          | 0.639        |
| PCC(GABA+/Cr)                 | 0.241              | <b>0.027</b>     | 0.225     | <b>0.040</b> | 0.184           | 0.094        |
| PCC(Glx/Cr)                   | 0.029              | 0.790            | 0.034     | 0.761        | 0.295           | <b>0.007</b> |
| WMH volume (cm <sup>3</sup> ) | -0.397             | <b>&lt;0.001</b> | -0.177    | 0.108        | -0.005          | 0.967        |

Abbreviations: GABA+: GABA plus co-edited macromolecules and homocarnosine; Glx: glutamate-glutamine; ACC: anterior cortical cortex; PCC: posterior cortical cortex.

**Supplementary Table 2. Mediation effects of metabolites on the association between WMH volume and executive function.**

| Metabolites   | Total effect (c) |         |                  | Direct effect (c') |         |                  | a       |              | b       |              | Indirect effect (ab) |        |                  |
|---------------|------------------|---------|------------------|--------------------|---------|------------------|---------|--------------|---------|--------------|----------------------|--------|------------------|
|               | Effect           | $\beta$ | p                | Effect             | $\beta$ | p                | $\beta$ | p            | $\beta$ | p            | Effect               | BootSE | 95% CI           |
| ACC(GABA+/Cr) |                  |         |                  | -0.090             | -0.334  | <b>0.002</b>     | -0.267  | <b>0.008</b> | 0.273   | <b>0.018</b> | -0.020               | 0.010  | (-0.042, -0.004) |
| ACC(Glx/Cr)   |                  |         |                  | -0.111             | -0.416  | <b>&lt;0.001</b> | -0.111  | 0.325        | -0.080  | 0.439        | 0.002                | 0.004  | (-0.003, 0.012)  |
| PCC(GABA+/Cr) | -0.109           | -0.407  | <b>&lt;0.001</b> | -0.103             | -0.386  | <b>&lt;0.001</b> | -0.104  | 0.359        | 0.202   | <b>0.045</b> | -0.006               | 0.007  | (-0.022, 0.008)  |
| PCC(Glx/Cr)   |                  |         |                  | -0.110             | -0.409  | <b>&lt;0.001</b> | 0.041   | 0.714        | 0.047   | 0.656        | 0.001                | 0.003  | (-0.004, 0.009)  |

Abbreviations: GABA+: GABA plus co-edited macromolecules and homocarnosine; Glx: glutamate-glutamine; ACC: anterior cortical cortex; PCC: posterior cortical cortex.

**Supplementary Table 3. Mediation effects of metabolites on the association between WMH volume and attention.**

| Metabolites   | Total effect (c) |         |       | Direct effect (c') |         |       | a       |              | b       |       | Indirect effect (ab) |        |                 |
|---------------|------------------|---------|-------|--------------------|---------|-------|---------|--------------|---------|-------|----------------------|--------|-----------------|
|               | Effect           | $\beta$ | p     | Effect             | $\beta$ | p     | $\beta$ | p            | $\beta$ | p     | Effect               | BootSE | 95% CI          |
| ACC(GABA+/Cr) |                  |         |       | -0.033             | -0.115  | 0.291 | -0.267  | <b>0.008</b> | 0.210   | 0.074 | -0.016               | 0.011  | (-0.041, 0.002) |
| ACC(Glx/Cr)   |                  |         |       | -0.052             | -0.185  | 0.083 | -0.111  | 0.325        | -0.126  | 0.226 | 0.004                | 0.005  | (-0.002, 0.017) |
| PCC(GABA+/Cr) | -0.049           | -0.171  | 0.108 | -0.043             | -0.151  | 0.151 | -0.104  | 0.359        | 0.197   | 0.055 | -0.006               | 0.008  | (-0.024, 0.007) |
| PCC(Glx/Cr)   |                  |         |       | -0.049             | -0.173  | 0.106 | 0.041   | 0.714        | 0.039   | 0.709 | 0.001                | 0.004  | (-0.006, 0.012) |

Abbreviations: GABA+: GABA plus co-edited macromolecules and homocarnosine; Glx: glutamate-glutamine; ACC: anterior cortical cortex; PCC: posterior cortical cortex.

**Supplementary Table 4. Mediation effects of metabolites on the association between WMH volume and episodic memory.**

| Metabolites   | Total effect (c) |         |       | Direct effect (c') |         |       | a       |              | b       |       | Indirect effect (ab) |        |                 |
|---------------|------------------|---------|-------|--------------------|---------|-------|---------|--------------|---------|-------|----------------------|--------|-----------------|
|               | Effect           | $\beta$ | p     | Effect             | $\beta$ | p     | $\beta$ | p            | $\beta$ | p     | Effect               | BootSE | 95% CI          |
| ACC(GABA+/Cr) |                  |         |       | 0.009              | 0.033   | 0.777 | -0.267  | <b>0.008</b> | 0.140   | 0.261 | -0.010               | 0.010  | (-0.033, 0.008) |
| ACC(Glx/Cr)   | -0.001           | -0.005  | 0.967 | -0.003             | -0.010  | 0.927 | -0.111  | 0.325        | -0.052  | 0.636 | 0.002                | 0.004  | (-0.006, 0.011) |
| PCC(GABA+/Cr) |                  |         |       | 0.004              | 0.014   | 0.897 | -0.104  | 0.359        | 0.181   | 0.095 | -0.005               | 0.008  | (-0.026, 0.006) |
| PCC(Glx/Cr)   |                  |         |       | -0.005             | -0.017  | 0.877 | 0.041   | 0.714        | 0.294   | 0.007 | 0.003                | 0.009  | (-0.015, 0.022) |

Abbreviations: GABA+: GABA plus co-edited macromolecules and homocarnosine; Glx: glutamate-glutamine; ACC: anterior cortical cortex; PCC: posterior cortical cortex.
